46 **Abstract:**

47 **Background:** Darier, Hailey-Hailey, and Grover's diseases are rare non-autoimmune  
48 acantholytic skin diseases. While these diseases have different underlying causes, they share  
49 defects in cell-cell adhesion in the epidermis and desmosome organization.

50 **Objective:** To better understand the underlying mechanisms leading to disease in these  
51 conditions we performed RNA-seq on lesional skin samples from Darier, Hailey-Hailey, and  
52 Grover's disease patients.

53 **Methods:** RNA-seq and bioinformatics analyses were performed on banked paraffin embedded  
54 diagnostic samples from each disease. For detailed Methods, please see the Methods section  
55 in this article's Online Repository at [www.jacionline.org](http://www.jacionline.org).

56 **Results:** The transcriptomic profiles of Darier, Hailey-Hailey, and Grover's disease were found  
57 to share a remarkable overlap, which did not extend to other common inflammatory skin  
58 diseases, psoriasis and atopic dermatitis. Analysis of enriched pathways showed a shared  
59 upregulation in keratinocyte differentiation and Th17 inflammatory pathways, and a decrease in  
60 cell adhesion and actin organization pathways in Darier, Hailey-Hailey, and Grover's disease.  
61 Direct comparison to atopic dermatitis and psoriasis showed that the downregulation in actin  
62 organization pathways was a unique feature in Darier, Hailey-Hailey, and Grover's disease.  
63 Further, upstream regulator analysis suggests that a decrease in SRF/MRTF activity may be  
64 responsible for the downregulation of actin organization pathways. Staining for MRTFA in  
65 lesional skin samples showed a decrease in nuclear MRTFA in patient skin compared to normal  
66 skin.

67 **Conclusion:** These findings highlight the significant level of similarity in the transcriptome of  
68 Darier, Hailey-Hailey, and Grover's disease, and identify decreases in actin organization  
69 pathways as a unique signature present in these conditions.

70

71 **Key Messages**

- 72       • Darier Disease, Hailey-Hailey Disease, and Grover's Disease share similar  
73       transcriptional profiles suggesting common mechanisms of pathogenesis.  
74       • SRF/MRTFA activity is reduced in Darier Disease, Hailey-Hailey Disease and Grover's  
75       disease, implicating actin organization in acantholysis.

76

77 **Keywords**

78 Darier Disease, Hailey-Hailey Disease, Grover's Disease, Acantholysis, MRTFA, Serum  
79 Response Factor

80

81 **Abbreviations**

- 82 AD: Atopic Dermatitis
- 83 DD: Darier Disease
- 84 ELK1: ETS transcription factor ELK1
- 85 ELK3: ETS transcription factor ELK3
- 86 ELK4: ETS transcription factor ELK4
- 87 HHD: Hailey-Hailey Disease
- 88 IPA: Ingenuity Pathway Analysis
- 89 GD: Grover's Disease
- 90 GSEA: Gene Set Enrichment Analysis
- 91 MRTFA: Myocardin-related transcription factor A
- 92 MRTFB: Myocardin-related transcription factor B
- 93 PCA: Principle Component Analysis
- 94 PSO: Psoriasis
- 95 SRF: Serum response factor
- 96 TAZ: transcriptional coactivator with PDZ-binding motif
- 97 YAP: Yes-associated protein
- 98

## 99 **Introduction:**

100 Acantholysis, or loss of adhesion between keratinocytes, is a common feature shared by the  
101 non-autoimmune skin diseases, Darier disease (DD), Hailey-Hailey disease (HHD), and  
102 Grover's disease (GD). While these diseases have varying clinical presentations and etiologies,  
103 they share acantholysis, and loss of desmosome function as major features. DD and HHD are  
104 caused by mutations in the calcium channels ATP2A2 or ATP2C1 respectively, suggesting that  
105 calcium dysregulation is a shared feature between DD and HHD, while the etiology for GD is  
106 unknown (1, 2). The biological mechanisms leading to disease in these conditions is largely  
107 unknown, limiting the clinical strategies for treatment to symptom reduction.

108 To better characterize the shared and divergent molecular and cellular processes driving DD,  
109 HHD and GD we performed transcriptome profiling on lesional skin samples. The results  
110 revealed that the transcriptional profiles of DD, HHD and GD are more similar to each other than  
111 to the common inflammatory skin conditions atopic dermatitis (AD) and psoriasis (PSO).  
112 Pathway analysis revealed unique signatures in DD, HHD and GD, in particular a  
113 downregulation in actin organization pathways, which may highlight novel underlying  
114 mechanisms leading to disease in these patients.

## 115 **Results and Discussion:**

### 116 **Transcriptome profiling of DD, HHD and GD patient samples reveals high level of** 117 **similarity**

118 Principle component analysis (PCA) of RNA-seq results from DD, HHD and GD showed a  
119 clustering of disease samples away from controls, however; the disease samples formed a  
120 larger mixed cluster (Figure 1A). Comparison of upregulated and downregulated genes showed  
121 substantial overlap in the genes across conditions (Figure 1B, C). Spearman correlations  
122 between disease conditions revealed a significant overlap among all three conditions (Figure  
123 1D-F). Based on these observations we tested if pathways known to be upregulated in DD, such  
124 as pathways associated with ER stress, were also present in the other conditions (3, 4). We  
125 performed upstream regulator analysis using Ingenuity Pathway Analysis (IPA) to determine if  
126 transcription factors that regulate ER stress response genes were predicted to be activated and  
127 found a significant increase in predicted ATF4 activity compared with control samples, and an  
128 upregulation in expression of many ATF4 target genes in DD, HHD and GD (Figure 1G). These  
129 observations suggest that while these diseases do have different etiology and presentation, the  
130 underlying changes in the skin transcriptome are similar.

### 131 **DD, HHD and GD share changes in keratinocyte differentiation and cell-cell adhesion** 132 **pathways**

133 Gene Set Enrichment Analysis (GSEA) on all conditions using Gene Ontology (GO) Biological  
134 Process (BP) pathways revealed increases in pathways associated with keratinocyte  
135 differentiation and decreases in pathways associated with cell-cell adhesion, actin organization,  
136 and RHO signaling (Figure 2A). To further explore the changes in keratinocyte differentiation we  
137 used single-cell RNA-seq data collected from normal skin to create gene set signatures using  
138 genes expressed specifically in basal, differentiated, and keratinized keratinocytes (5).  
139 Comparison of these gene sets to DD, HHD and GD using GSEA revealed a decrease in basal  
140 associated genes, and a significant increase in keratinized associated genes in all conditions,  
141 suggesting a defect in normal keratinocyte differentiation (Figure 2B). We also observed a

142 decrease in pathways associated with cell-cell adhesion, fitting with observations of  
143 acantholysis in the skin in these patients (Figure 2C).

#### 144 **DD, HHD and GD share greater similarities to each other than to psoriasis and atopic** 145 **dermatitis**

146 We next compared DD, HHD and GD to other more common skin diseases, PSO and AD, to  
147 determine shared and unique features across these diseases. To perform direct comparisons  
148 between each condition the DD, HHD and GD samples were pooled with a publicly available  
149 PSO and AD dataset, and batch corrected (6). Spearman correlation followed by hierarchical  
150 clustering showed that PSO, AD, and control samples tend to cluster together, while DD, HHD,  
151 and GD formed two intermixed clusters (Figure 3A). Similarly, dimensional reduction using  
152 UMAP showed AD, PSO, and controls separating into distinct clusters, while DD, HHD, and GD  
153 cluster into a mixed group (Figure 3B)(7), suggesting that these diseases share greater  
154 similarity to each other than to AD or PSO. Comparing overlap in significantly upregulated and  
155 downregulated genes between PSO, AD, and combined non-autoimmune acantholytic disease  
156 samples showed significant overlap in upregulated genes across all disease, but non-significant  
157 overlap in downregulated genes between the non-autoimmune acantholytic diseases and PSO  
158 and AD, suggesting that the difference in transcriptional signatures is largely driven by  
159 downregulated genes in DD, HHD and GD (Figure 3C). GSEA using GO BP pathways revealed  
160 shared overlap in upregulated pathways involved in keratinocyte differentiation and  
161 inflammatory responses between DD, HHD, GD, PSO and AD (Figure 3D). When analyzing  
162 downregulated pathways, we observed numerous pathways that were only downregulated in  
163 DD, HHD, and GD but not AD and PSO, such as actin cytoskeleton organization and focal  
164 adhesion assembly (Figure 3E). While these non-autoimmune acantholytic skin diseases are  
165 typically associated with desmosome dysfunction, these observations suggest that there is actin  
166 cytoskeleton dysregulation as well (8-11).

#### 167 **DD, HHD and GD share a weak Th17 inflammatory signature that is similar to psoriasis**

168 Previous work with the AD and PSO data sets has already shown that IL-17 and IFNG response  
169 pathways are upregulated in both, while IL-13 response pathways are upregulated specifically in  
170 AD (6). However, the inflammatory signatures associated with DD, HHD, and GD are unknown;  
171 therefore, we used IPA to examine predicted cytokine upstream regulators. We observed an  
172 increase in IFNG, IL-17A, IL-36G and IL-36A responses in all conditions (Figure 4A). However,  
173 the extent of enrichment was lower in DD, HHD and GD compared to AD and PSO. IL-13  
174 responses were only enriched in AD samples (Figure 4A). Analyzing gene expression of  
175 defining cytokines in these response pathways showed modest statistically significant increases  
176 in expression of IL17A in DD and HHD, while other cytokines were not upregulated in these  
177 conditions (Figure 4B, C). These data suggest that DD, HHD and GD share a Th17  
178 inflammatory signature, though one that is not as prominent as what is observed in PSO. These  
179 observations are in agreement with descriptions of the immune infiltrate in DD, HHD and GD,  
180 with a low level of inflammatory cell recruitment in lesional skin, and together suggest that the  
181 inflammatory signature is not a critical driver of disease (12).

#### 182 **SRF/MRTF activity is predicted to be downregulated in the skin in DD, HHD, and GD** 183 **patients**

184 We next sought to examine unique features present in the non-autoimmune acantholytic skin  
185 disease compared to PSO and AD. The downregulation of actin organization pathways was

186 identified as a distinct feature in DD, HHD and GD compared to AD and PSO (Figure 3E). To  
187 explore factors responsible for the downregulation of actin organization pathways in DD, HHD  
188 and GD we focused on two major known transcription factors that regulate actin organization:  
189 serum response factor (SRF) and yes-associated protein/transcriptional coactivator with PDZ-  
190 binding motif (YAP/TAZ). Upstream regulator analysis revealed a predicted decrease in SRF  
191 activity, with no change in YAP/TAZ in DD, HHD, and GD (Figure 5A), indicating that a  
192 reduction in SRF activity may be responsible for the observed downregulation of actin  
193 organization pathways in these conditions. GSEA of predicted transcription factor target genes  
194 using the transcription factor targets database from MSigDB revealed a decrease in genes  
195 containing SRF binding motifs, with a trend towards an increase in TAZ target genes (Figure  
196 5B) (13-15). This observation is in line with the upstream regulator findings, again suggesting  
197 that SRF activity is reduced in the skin of patients with DD, HHD and GD. Additionally, we  
198 assessed changes in SRF cofactors. The primary mechanisms by which SRF can influence  
199 gene expression are through interaction with MRTFs or interactions with the ternary complex  
200 factors (ELK-1, ELK-3, and ELK-4). Upstream regulator analysis predicts decreased activity of  
201 MRTFA and MRTFB, while activity of ELK-1 ELK-3 and ELK-4 remains unchanged in DD, HHD  
202 and GD (Figure 5C). Finally, to validate these observations we stained patient skin samples for  
203 MRTFA and YAP1. We found that the nuclear/cytoplasmic staining intensity for MRTFA was  
204 significantly reduced in patient samples, while YAP staining, though highly variable, showed a  
205 trend towards greater levels in patient samples. (Figure 5D, E). Given the importance of  
206 SRF/MRTFA signaling in epidermal differentiation and barrier formation, its dysregulation in  
207 these disorders is likely a contributor to pathogenesis of these diseases (16).

208 The acantholysis seen in these conditions is commonly attributed to desmosome dysfunction.  
209 While desmosomes are classically defined as organizers of the intermediate filament  
210 cytoskeleton, previous work from our group has demonstrated that desmosomes can regulate  
211 actin remodeling (17-19). Collectively, these observations raise the possibility that acantholysis  
212 in patients with DD, HHD and GD, is driven by interference with desmosomes and associated  
213 actin organization. Furthermore, this study is the first to mechanistically link GD with  
214 characterized calcium pump mutation-driven acantholytic disorders. While the question of  
215 calcium signaling dysregulation in GD remains, the downstream transcriptional profiles share  
216 remarkable overlap in all conditions and present novel regulatory pathways at play in poorly  
217 understood non-autoimmune acantholytic diseases.

218



219 **Acknowledgments**

220 We thank the members of the Green Lab for their valuable feedback and discussion. We also  
221 thank the Lee family for their generous support.

222

223 **References**

- 224 1. Sakuntabhai A, Ruiz-Perez V, Carter S, Jacobsen N, Burge S, Monk S, et al. Mutations  
225 in ATP2A2, encoding a Ca<sup>2+</sup> pump, cause Darier disease. *Nature Genetics*.  
226 1999;21(3):271-7.
- 227 2. Sudbrak R, Brown J, Dobson-Stone C, Carter S, Ramser J, White J, et al. Hailey–Hailey  
228 disease is caused by mutations in ATP2C1 encoding a novel Ca<sup>2+</sup> pump. *Human*  
229 *Molecular Genetics*. 2000;9(7):1131-40.
- 230 3. Onozuka T, Sawamura D, Goto M, Yokota K, Shimizu H. Possible role of endoplasmic  
231 reticulum stress in the pathogenesis of Darier's disease. *Journal of Dermatological*  
232 *Science*. 2006;41(3):217-20.
- 233 4. Savignac M, Simon M, Edir A, Guibbal L, Hovnanian A. SERCA2 dysfunction in Darier  
234 disease causes endoplasmic reticulum stress and impaired cell-to-cell adhesion  
235 strength: rescue by Miglustat. *J Invest Dermatol*. 2014;134(7):1961-70.
- 236 5. Godsel LM, Roth-Carter QR, Koetsier JL, Tsoi LC, Huffine AL, Broussard JA, et al.  
237 Translational implications of Th17-skewed inflammation due to genetic deficiency of a  
238 cadherin stress sensor. *J Clin Invest*. 2022;132(3).
- 239 6. Tsoi LC, Rodriguez E, Degenhardt F, Baurecht H, Wehkamp U, Volks N, et al. Atopic  
240 Dermatitis Is an IL-13-Dominant Disease with Greater Molecular Heterogeneity  
241 Compared to Psoriasis. *J Invest Dermatol*. 2019;139(7):1480-9.
- 242 7. McInnes L, Healy J, Melville J. Umap: Uniform manifold approximation and projection for  
243 dimension reduction. arXiv preprint arXiv:180203426. 2018.
- 244 8. Hashimoto K, Fujiwara K, Tada J, Harada M, Setoyama M, Eto H. Desmosomal  
245 dissolution in Grover's disease, Hailey-Hailey's disease and Darier's disease. *J Cutan*  
246 *Pathol*. 1995;22(6):488-501.
- 247 9. Hashimoto K, Fujiwara K, Harada M, Setoyama M, Eto H. Junctional proteins of  
248 keratinocytes in Grover's disease, Hailey-Hailey's disease and Darier's disease. *J*  
249 *Dermatol*. 1995;22(3):159-70.
- 250 10. Hobbs RP, Amargo EV, Somasundaram A, Simpson CL, Prakriya M, Denning MF, et al.  
251 The calcium ATPase SERCA2 regulates desmoplakin dynamics and intercellular  
252 adhesive strength through modulation of PKC $\alpha$  signaling. *Faseb j*.  
253 2011;25(3):990-1001.
- 254 11. Hakuno M, Shimizu H, Akiyama M, Amagai M, Wahl JK, Wheelock MJ, et al.  
255 Dissociation of intra- and extracellular domains of desmosomal cadherins and E-  
256 cadherin in Hailey-Hailey disease and Darier's disease. *Br J Dermatol*. 2000;142(4):702-  
257 11.
- 258 12. See SHC, Peternel S, Adams D, North JP. Distinguishing histopathologic features of  
259 acantholytic dermatoses and the pattern of acantholytic hypergranulosis. *Journal of*  
260 *Cutaneous Pathology*. 2019;46(1):6-15.
- 261 13. Subramanian A, Tamayo P, Mootha VK, Mukherjee S, Ebert BL, Gillette MA, et al. Gene  
262 set enrichment analysis: A knowledge-based approach for interpreting genome-wide  
263 expression profiles. *Proceedings of the National Academy of Sciences*.  
264 2005;102(43):15545-50.
- 265 14. Kolmykov S, Yevshin I, Kulyashov M, Sharipov R, Kondrakhin Y, Makeev VJ, et al.  
266 GTRD: an integrated view of transcription regulation. *Nucleic Acids Res*.  
267 2021;49(D1):D104-d11.
- 268 15. Xie X, Lu J, Kulbokas EJ, Golub TR, Mootha V, Lindblad-Toh K, et al. Systematic  
269 discovery of regulatory motifs in human promoters and 3' UTRs by comparison of  
270 several mammals. *Nature*. 2005;434(7031):338-45.

- 271 16. Koegel H, von Tobel L, Schäfer M, Alberti S, Kremmer E, Mauch C, et al. Loss of serum  
272 response factor in keratinocytes results in hyperproliferative skin disease in mice. *J Clin*  
273 *Invest.* 2009;119(4):899-910.
- 274 17. Broussard JA, Yang R, Huang C, Nathamgari SSP, Beese AM, Godsel LM, et al. The  
275 desmoplakin-intermediate filament linkage regulates cell mechanics. *Mol Biol Cell.*  
276 2017;28(23):3156-64.
- 277 18. Godsel LM, Dubash AD, Bass-Zubek AE, Amargo EV, Klessner JL, Hobbs RP, et al.  
278 Plakophilin 2 couples actomyosin remodeling to desmosomal plaque assembly via  
279 RhoA. *Mol Biol Cell.* 2010;21(16):2844-59.
- 280 19. Nekrasova O, Harmon RM, Broussard JA, Koetsier JL, Godsel LM, Fitz GN, et al.  
281 Desmosomal cadherin association with Tctex-1 and cortactin-Arp2/3 drives  
282 perijunctional actin polymerization to promote keratinocyte delamination. *Nature*  
283 *Communications.* 2018;9(1):1053.
- 284
- 285

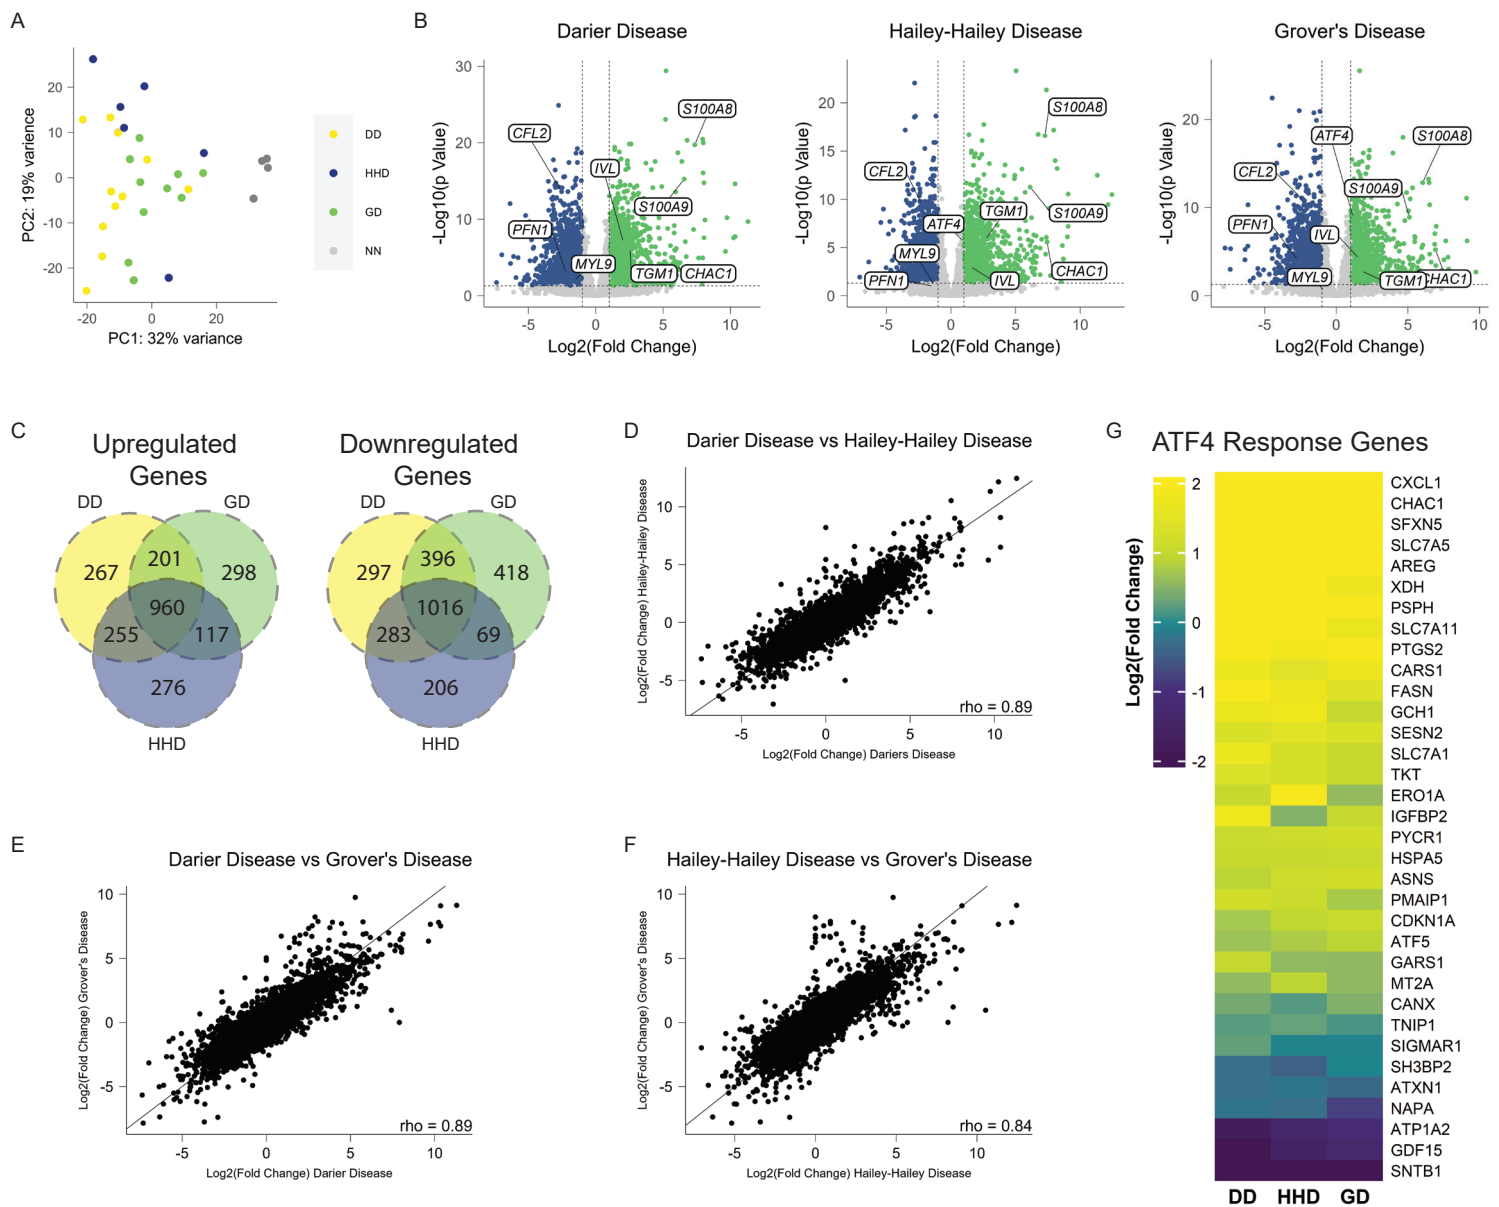

**Figure 1. Whole transcriptome profiling of Darier, Hailey-Hailey and Grover's disease samples reveals high level of similarity between conditions.** A) Principal component analysis of samples from DD, HHD, GD, and NN. B) Volcano plot showing significantly upregulated (green) and downregulated (blue) genes in DD, HHD and GD compared to NN skin. C) Venn diagram showing overlap in significantly changed genes in DD, HHD, and GD. D-F) Correlation analysis of gene expression values from DD, HHD and GD. G) Heatmap showing gene expression of ATF4 response genes.

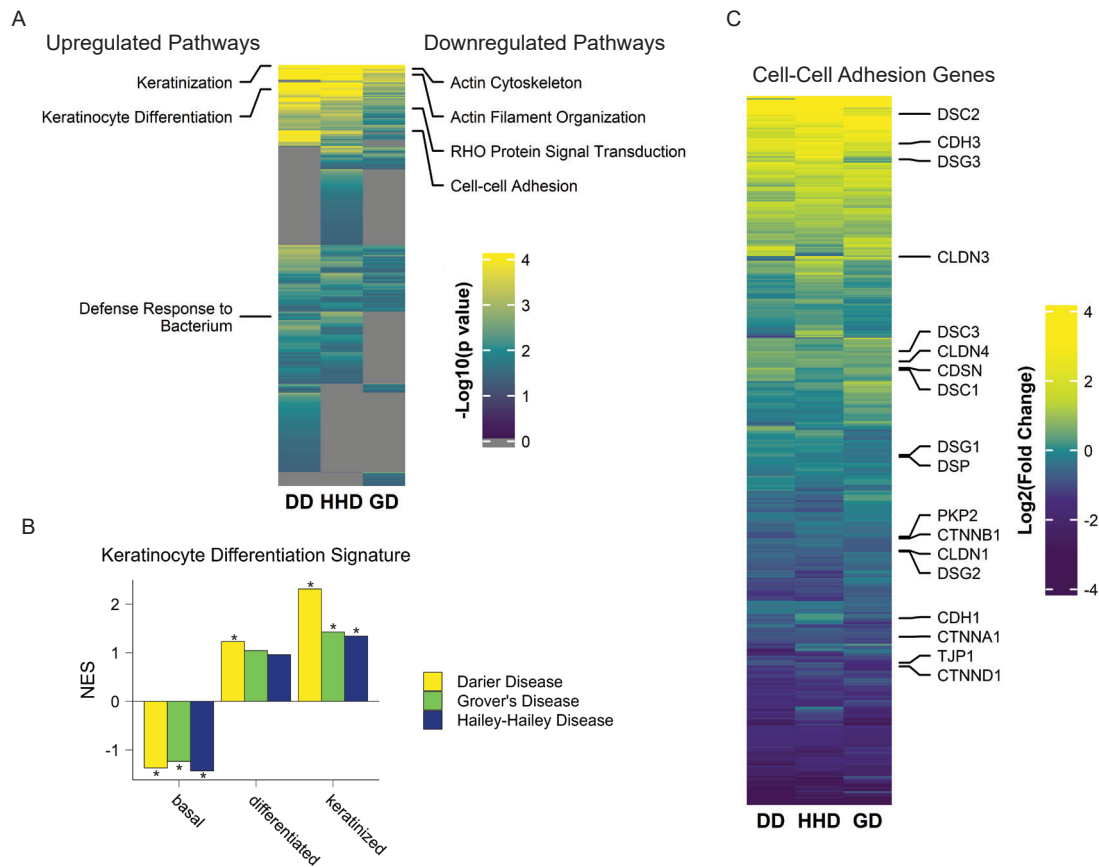

**Figure 2. Pathway analysis reveals shared changes in keratinocyte differentiation and cell-cell adhesion in DD, HHD and GD.** A) Heatmap showing GO BP pathways ranked by  $-\text{Log}_{10}(\text{p value})$  for DD, HHD and GD. Selected upregulated pathways are noted on the left of the heatmap, while downregulated pathways are noted on the right. B) DD, HHD and GD gene expression changes were compared to keratinocyte differentiation signatures using GSEA.  $\text{FDR} < 0.05$ . C) Heatmap showing  $\text{log}_2(\text{FoldChange})$  values compared with controls for genes annotated to the GO BP cell-cell adhesion pathway.

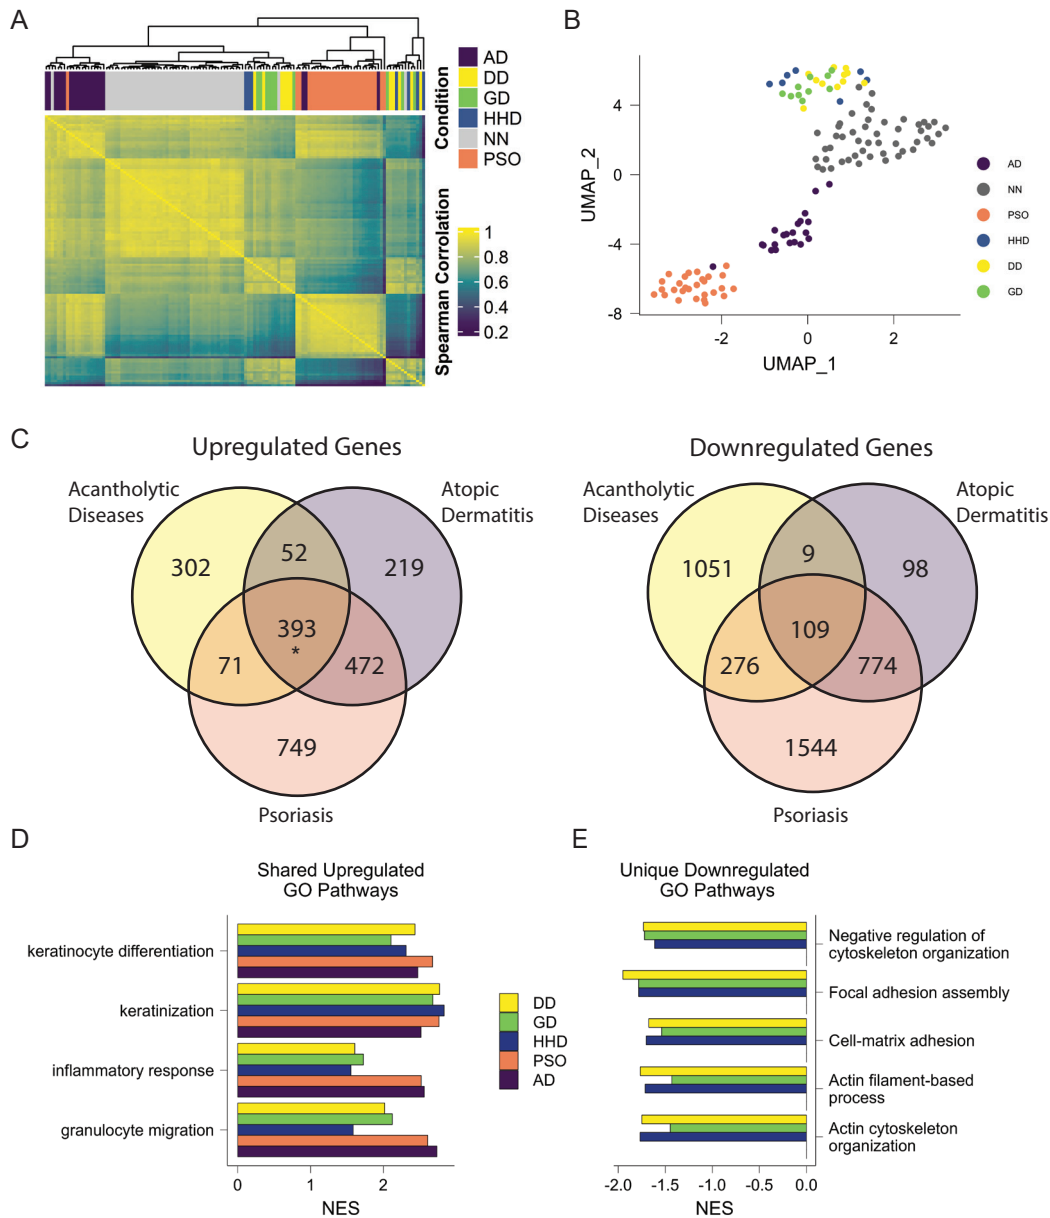

**Figure 3. DD, HHD and GD are more similar to each other than to PSO and AD.** A) Heatmap showing Spearman correlation values between the batch-adjusted counts from all individual samples grouped using hierarchical clustering. B) Dimensional reduction plot using UMAP on all individual samples. C) Venn diagrams showing overlap in genes upregulated or downregulated in PSO, AD, and combined acantholytic diseases ( $p=0.4$  for downregulated genes and  $p<0.00001$  for upregulated genes by permutation test). D) Significantly upregulated GO BP pathways present in all conditions. E) GO BP pathways significantly downregulated in DD, HHD and GD, but unchanged in PSO and AD.

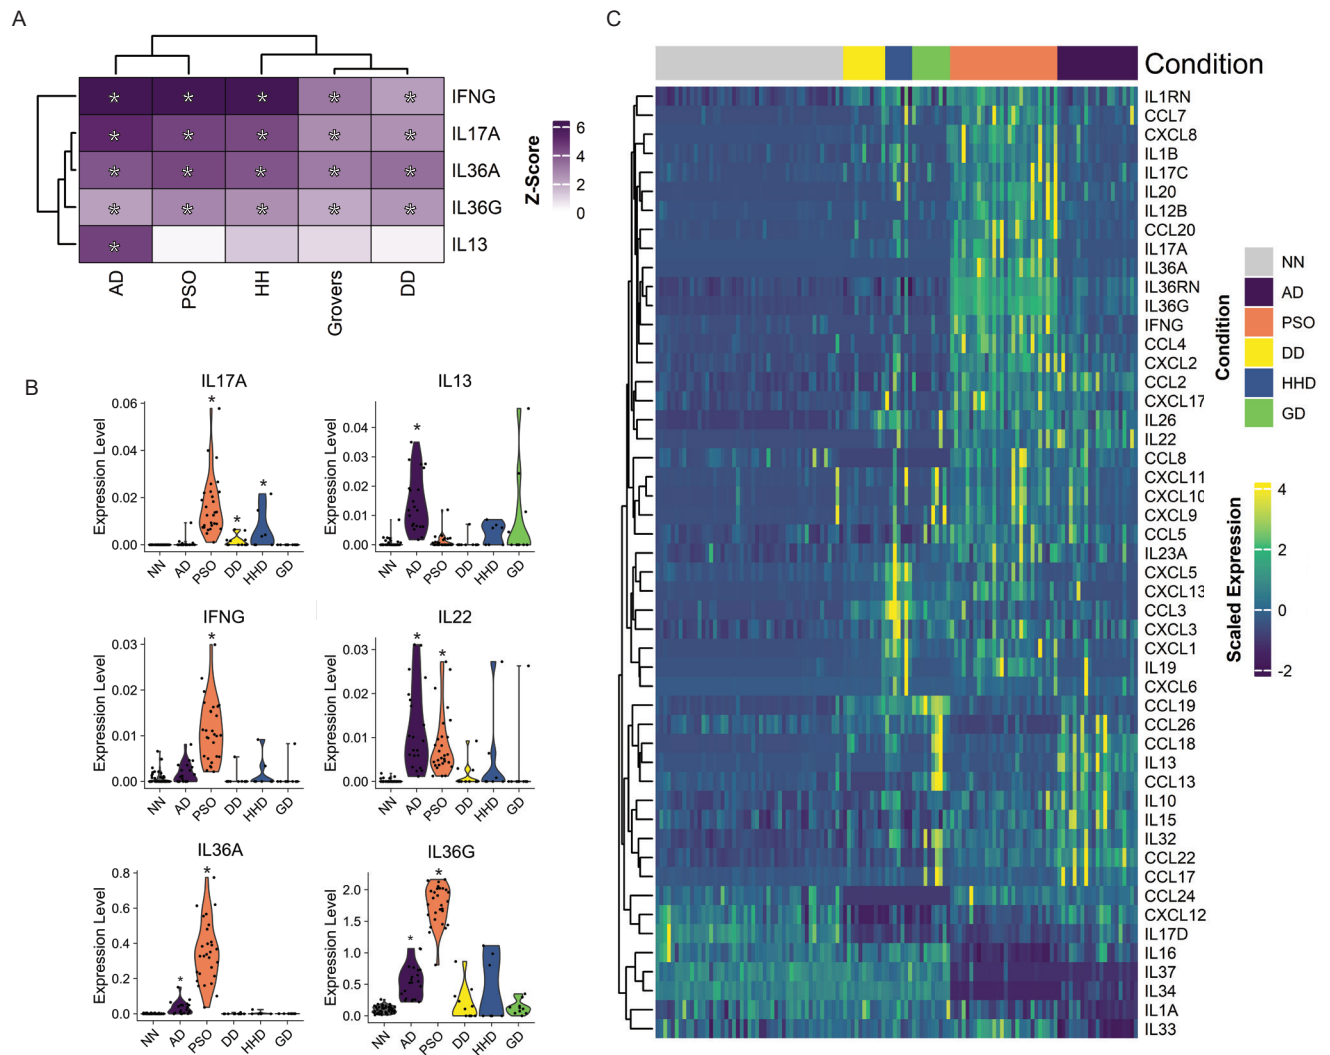

**Figure 4. Th17 inflammatory signatures are common across DD, HHD, GD, PSO and AD, while only AD has Th2 inflammatory signatures.** A) Heatmap showing z-scores of predicted upstream regulators identified using Ingenuity Pathway Analysis (IPA) with a focus on cytokines. B) Violin plots demonstrating expression levels of 6 cytokines from all conditions including controls (NN). C) Heatmap depicting scaled expression of cytokines and chemokines across conditions.

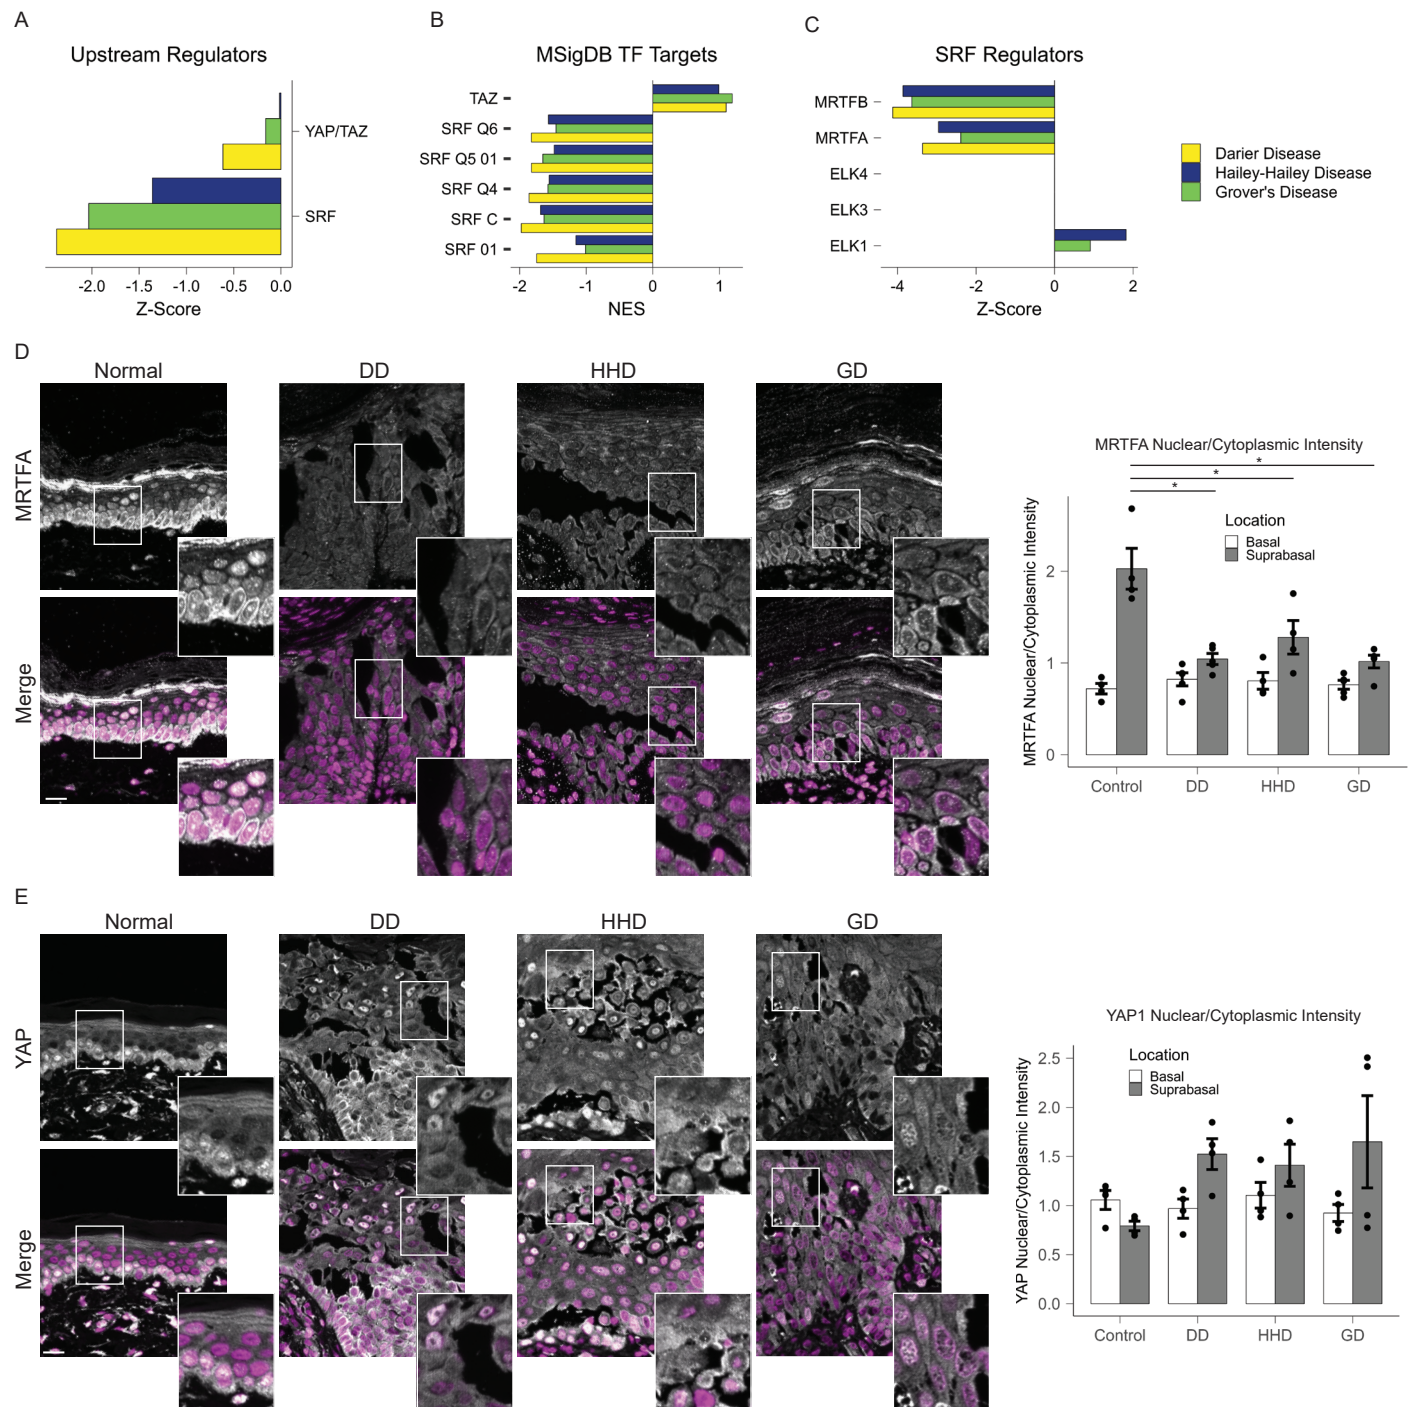

**Figure 5. SRF is predicted to be downregulated in acantholytic skin diseases.** A) Predicted activity of actin organization regulating transcription factors identified using upstream regulator analysis. B) Enrichment (NES) of SRF target sequences and TAZ target genes from MSigDB predicted TF Targets database. C) IPA upstream regulator analysis showing predicted activity of SRF cofactors. Signatures were not detected for ELK3 and 4. D) Immunostaining for MRTFA in DD, HHD, GD and NN skin. Quantification of MRTFA nuclear and cytoplasmic pixel intensities measured in basal and suprabasal cells. Scale bar = 20µm. E) Immunostaining for YAP1 in DD, HHD, GD and NN skin. Quantification of YAP1 nuclear and cytoplasmic pixel intensities measured in basal and suprabasal cells. Scale bar = 20µm.
