# Supplementary material for: Transcriptional profiling of rare acantholytic disorders suggests common mechanisms of pathogenesis
Source: bioRxiv or medRxiv preprint supplement (doi:10.1101/2022.12.02.518412), 2022-12-20
Supplement: Supplementary file [file media-1.pdf]

1 **Online Repository**

2 **METHODS**

3 **Study Approval**

4 Darier disease, Hailey-Hailey disease, Grover's disease patients and healthy adults provided  
5 informed consent for skin biopsies. Tissues were anonymized for analysis and collected under  
6 IRB# HUM00087890 at University of Michigan.

7 **Additional Gene Expression Datasets**

8 Atopic Dermatitis and Psoriasis RNAseq dataset was downloaded from Gene Expression  
9 Omnibus (GEO), accession number GSE121212. This dataset is originally described in (1).  
10 Single-cell RNA-seq dataset used to generate keratinocyte differentiation genes sets is  
11 available in GEO, accession number GSE179162.

12 **RNA-Seq expression profiling of Darier, Hailey-Hailey and Grover's disease samples.**

13 RNA was isolated from 10 um sections of formalin-fixed paraffin embedded blocks from 11  
14 Darier disease, 7 Hailey-Hailey disease, and 10 Grover's disease samples. RNA was isolated  
15 using the E.N.Z.A. FFPE RNA Kit (Omega Bio-tek). Samples were prepared using the Lexogen  
16 3' QuantSeq mRNA-Seq Library Prep Kit FWD and sequences on the Illumina NovaSeq 6000  
17 System. Quality control and adaptor trimming were performed on sequence reads from the  
18 RNA-Seq data. STAR alignment was used to align the reads to the reference genome  
19 (GRCh37), and HTSeq was used for gene quantification. To eliminate potential differences  
20 caused by sex specific genes, Y chromosome genes and genes known to be differentially  
21 expressed between males and females in skin were removed from further analysis (2). To  
22 generate differential expression for Darier, Hailey-Hailey, and Grover's disease the DESeq2  
23 Bioconductor R Package V1.34.0 was used.

24 **Correlation Analysis between Darier disease, Hailey-Hailey disease, Grover's disease,  
25 Psoriasis and Atopic Dermatitis.**

26 Analysis was performed in R V4.1.1 (R Foundation for Statistical Computing). Batch correction  
27 was performed using ComBat-seq function under the SVA Bioconductor R package V3.36.0.0  
28 following published method (3). PCA was computed based on batch-adjusted raw counts using  
29 R package pcaMethods V1.86.0. For comparisons between Darier Disease, Hailey-Hailey  
30 Disease, Grover's disease, psoriasis, and atopic dermatitis the EdgeR Bioconductor R Package  
31 V3.36.0 was used to generate differential expression data from batch-adjusted raw counts and  
32 calculate statistically significantly changed genes by ANOVA. Genes that had an FDR-adjusted  
33 p value < 0.05 and  $|\text{Log}_2(\text{Fold Change})| > 1$  in any one condition were used for all further  
34 comparison analysis. Spearman correlations were calculated using the batch-adjusted raw  
35 counts and the *cor* function in R build-in stats package. UMAP plots were created using the  
36 Seurat package in R V4.1.1.

37 **Functional Enrichment Analysis**

38 Functional enrichment analysis was performed using the clusterProfiler package in R V4.2.2  
39 and using Ingenuity Pathway Analysis (IPA) software. Pathway analysis was performed using  
40 Gene Ontology Biologic Process and the Transcription Factor Targets pathways, and were  
41 analyzed using Gene Set Enrichment Analysis (GSEA)(4).

## 42 Immunofluorescence and image acquisition

43 DD, HHD, GD and normal patient skin samples were fixed in 10% formalin, embedded in  
44 paraffin blocks and cut into 4 $\mu$ m thick sections. For immunostaining paraffin sections were  
45 baked at 60°C overnight and de-paraffinized with xylene. Samples were then rehydrated  
46 through a series of ethanol and PBS washes, and permeabilized in 0.5% Triton X-100 in PBS.  
47 Antigen Retrieval was performed by incubating the slides in 0.01 M citrate buffer at 95°C for 15  
48 minutes. Samples were blocked in blocking buffer (1% BSA, 2% normal goat serum in PBS) for  
49 1 hour at 37°C. Samples were then incubated in primary antibody overnight at 4°C, followed by  
50 washes with PBS and incubation in secondary antibody for 1 hour at 37°C. Images were  
51 acquired using an AxioVision Z1 system (Carl Zeiss) with an Apotome slide module, and  
52 AxioCam MRm digital camera and a 20x (0.8 NA Plan-Apochromat) objective. Image analysis  
53 was performed using ImageJ software.

## 54 Antibodies

55 Antibodies used in this study include: rabbit anti-YAP1 (14074, Cell Signaling), rabbit anti-  
56 MRTFA (PA599446, ThermoFisher Scientific), AlexaFluor 568-conjugated goat anti-rabbit  
57 secondary antibodies (ThermFisher Scientific).

## 58 Statistics Analysis

59 Permutation analysis for Venn Diagrams was performed to test the significance of the overlap.  
60 10,000 permutations were conducted from non-replacement random sampling of 6,000 tokens.  
61 An empirical p value is calculated by comparing the actual and the permutation results.

62 For image analysis statistical analysis was performed using one-way ANOVA with Dunnett  
63 correction for multiple comparisons, with all disease samples compared only to control samples.  
64  $P < 0.05$  was considered statistically significant, and data represent mean  $\pm$  SEM.

## 65 Data Availability

66 The resulting RNA-seq data sets generated for this study will be available in GEO at the time of  
67 publication, and all code used to analyze the data will be available.

## 68 References

- 69
- 70 1. Tsoi LC, Rodriguez E, Degenhardt F, Baurecht H, Wehkamp U, Volks N, et al. Atopic  
71 Dermatitis Is an IL-13-Dominant Disease with Greater Molecular Heterogeneity  
72 Compared to Psoriasis. *J Invest Dermatol.* 2019;139(7):1480-9.
  - 73 2. Gershoni M, Pietrokovski S. The landscape of sex-differential transcriptome and its  
74 consequent selection in human adults. *BMC Biology.* 2017;15(1):7.
  - 75 3. Zhang Y, Parmigiani G, Johnson WE. ComBat-seq: batch effect adjustment for RNA-seq  
76 count data. *NAR Genom Bioinform.* 2020;2(3):lqaa078.
  - 77 4. Liberzon A, Birger C, Thorvaldsdóttir H, Ghandi M, Mesirov JP, Tamayo P. The  
78 Molecular Signatures Database (MSigDB) hallmark gene set collection. *Cell Syst.*  
79 2015;1(6):417-25.

80
